# Supplementary material
Source: PubMed Central journal article supplement (PMC9382914)
Supplement: jamasurg-e213301-s001.pdf [file jamasurg-e213301-s001.pdf]

## Supplemental Online Content

Rangel EL, Castillo-Angeles M, Easter SR, et al. Incidence of infertility and pregnancy complications in US female surgeons. *JAMA Surg*. Published online July 28, 2021. doi:10.1001/jamasurg.2021.3301

**eMethods.** Sample survey

This supplemental material has been provided by the authors to give readers additional information about their work.

**eMethods.** Sample survey

**Pregnancy complications, infertility, and family planning in surgeons: impact on surgeon burnout and attrition**

Please complete the survey below. Please do not do this survey more than once. Thank you!

**Demographics**

Do you identify as ...?

- Male
- Female
- Prefer not to answer/not listed

What relationship status best describes your current situation?

- Single, never married
- Married or domestic partnership
- Significant other
- Widowed and single
- Divorced and single
- Separated and single

Is your spouse or partner... ?

- Male
- Female
- Prefer not to answer

Is your spouse or partner... ?

- A physician
- A surgeon
- Works in another field
- Not employed

How many hours a week does your spouse/partner work (excluding domestic obligations)?

- 0 to < 20 hours
- 20 to < 40 hours
- 40 to < 60 hours
- >=60 hours

What racial or ethnic group do you identify with? (Select all that apply)

- Caucasian/White
- African-American/Black
- Asian
- Native Hawaiian/Pacific Islander
- Native American
- Hispanic/Latino
- Other
- Please specify: \_\_\_\_\_

What year did you complete your Surgery Residency? If you did fellowship, please cite the year you completed Residency. (Select year between 1985 and 2020, or select "I am still a resident")

What is your surgical subspecialty? (If you are in training and have not matched yet please select Resident)

- Resident
- Breast Surgery
- Cardiothoracic surgery
- Colorectal Surgery
- ENT

- General
- HPB Surgery
- MIS/Bariatric Surgery
- Neurosurgery
- Orthopedic Surgery
- Pediatric surgery
- Plastic Surgery
- Surgical Oncology
- Trauma/critical care
- Urology
- Vascular Surgery
- Transplant Surgery
- Endocrine Surgery

What is your age? \_\_\_\_\_

What is your title?

- Resident
- Fellow
- Instructor
- Assistant professor
- Associate professor
- Full professor
- Practicing surgeon in non-academic setting

What setting most describes your current practice?

- Academic
- Community/private practice
- Affiliated with academic hospital
- Military
- Other

What state do you live in? (If you have biologic children, please choose the state you lived in when you conceived your child) (Select from list of 50 states)

### **Personal Family Goals**

Do you have children?

- Yes
- No, but I am hoping to have children at some point in my life
- No, I do not wish to have children
- No, I tried (biologic, assisted reproduction, adoption, or surrogacy) but I am not planning to try any more

How many children do you have? (Select number 1-8)

How many biological children do you have? (Select number 1-8)

Do you have the number of children you want for your family?

- Yes, I have all the children I want and had them naturally
- Yes, I have all the children I want but needed assisted reproduction, adoption, or surrogacy
- No, I have fewer than I wanted and I'm done trying. I did NOT try assisted reproduction, adoption, or surrogacy
- No, I have fewer than I wanted and I'm done trying. I DID try assisted reproduction, adoption, or surrogacy
- No, I have fewer than I want but I am still trying to have more kids
- I am unsure if I want more kids in the future

**Pregnancy loss (for female participants only)**

How many pregnancy losses at < 10 weeks have you experienced? (Select number 0-15)

How much time did you take off work after your pregnancy loss(es)? (Select average if more than one pregnancy loss)

- 0 days
- 1 - 7 days
- 1 - 2 weeks
- 3 - 4 weeks
- 4 weeks

I felt my colleagues were supportive of extra time off after my pregnancy loss(es).

- Strongly agree
- Agree
- Disagree
- Strongly disagree
- I didn't tell them

I felt the leadership (PD, division chief or chair, boss, practice manager) were supportive of extra time off after my pregnancy loss(es).

- Agree
- Strongly agree
- Disagree
- Strongly disagree
- I didn't tell him or her

How many pregnancy losses between 10-20 weeks have you experienced? (select number 0-15)

Was/Were the loss(es) due to: (Check all that apply)

- Fetal Demise
- Spontaneous Labor or Rupture of Membranes
- Pregnancy Termination for fetal malformation
- Pregnancy Termination for other reason
- Other. Please specify: \_\_\_\_\_
- I don't know

How much time did you take off work after your pregnancy loss(es)?

- 0 days
- 1 - 7 days
- 1 - 2 weeks
- 3 - 4 weeks
- 4 weeks

I felt my colleagues were supportive of extra time off after my pregnancy loss(es).

- Strongly agree
- Agree
- Disagree
- Strongly disagree
- I didn't tell them

I felt the leadership (PD, division chief or chair, boss, practice manager) were supportive of extra time off after my pregnancy loss(es).

- Strongly agree
- Agree
- Disagree
- Strongly disagree

- I didn't tell him or her

Have you experienced the loss of a pregnancy or baby after 20 weeks gestation (stillbirth or neonatal demise)?

- Yes:

- How many times (Select number 1-15)
- Was/Were the loss(es) due to:
  - Fetal Demise
  - Spontaneous Labor or Rupture of Membranes
  - (Check all that apply) Pregnancy Termination for fetal malformation
  - Pregnancy Termination for other reason
  - Other
  - Please specify: \_\_\_\_\_

How much time did you take off work after your pregnancy loss(es)?

- 0 days
- 1 - 7 days
- 1 - 2 weeks
- 3 - 4 weeks
- 4 weeks

I felt my colleagues were supportive of extra time off after my pregnancy loss(es).

- Strongly agree
- Agree
- Disagree
- Strongly disagree
- I didn't tell them

I felt the leadership (PD, division chief or chair, boss, practice manager) were supportive of extra time off after my pregnancy loss(es).

- Strongly agree
- Agree
- Disagree
- Strongly disagree
- I didn't tell him or her

- No

### **Assisted Reproduction**

Have you or your partner ever undergone testing for infertility?

- Yes

What was determined to be the source of infertility/what was the reason to obtain infertility consultation? (Select all that apply)

- Partner sperm issue
- Inadequate ovarian reserve
- Structural uterine or fallopian tube issue
- Recurrent pregnancy losses
- Preimplantation genetic testing/screening
- Other Please specify: \_\_\_\_\_
- Don't know

- No

Have you or your partner used assisted reproductive technologies such as medical ovarian stimulation, intrauterine insemination, in vitro fertilization, egg or embryo freezing?

- Yes

How many times were you or your partner able to have a child using assisted reproductive technologies (do not include pregnancies that ended in loss before 20 weeks' gestation)? (Select number 0-10)

What assisted reproductive technologies did you and your partner use? (Select all that apply)

- Ovarian stimulation with medications
- Intrauterine insemination

- In vitro fertilization
- Embryo freezing (may include embryos using own eggs/sperm or donor eggs/sperm)
- Egg freezing
- Donor egg

What is the number of total assisted reproductive cycles you or your partner have tried? (total attempts using ANY type of technology) \_\_\_\_\_

Estimate the number of FULL days off YOU (not your partner) took off work for all cycles

- 0 days
- 1-3 days
- 4-7 days
- 8-14 days
- 15-21 days
- >21 days
- I don't know

What was your estimated OUT-OF-POCKET expense for these cycles all together?

- 0-\$40k
- 40-< 80k
- 80-< 120k
- 120-< 160k
- 160-< 200k
- >200k
- I don't know

What stage(s) of your career were you in when you or your partner underwent assisted reproduction? (check all that apply)

- Before Residency
- Resident
- Fellow
- Junior faculty (0-3 years postgraduate)
- Early career (>3 years-7 years postgraduate)
- Mid career (>7 years-12 years postgraduate)
- Late career (>12 years postgraduate)

○ No

Can you specify the reason for this?

- Not ready yet
- Lack of a partner
- Process was too difficult or complicated
- Hoping to conceive naturally still
- Too expensive
- Work demands and time constraints
- Lack of social support
- Did not think of it
- Decided to use a surrogate
- Decided to adopt
- Not applicable (N/A)

Have you used a surrogate?

○ Yes

What is the reason you did surrogacy?

- Medical contraindication (not uterine) to pregnancy
- Uterine contraindication to pregnancy
- Unable to carry pregnancy for unknown reasons
- Other medical recommendation

- Elective (not due to medical reasons)
- Other. Please specify: \_\_\_\_\_

What was your total out of pocket expense for all surrogate gestations?

- 0 - \$40k
- 40 - < 80k
- 80 - < 120k
- 120 - < 1600k
- 160 - < 200k
- >200k

What is the duration of PAID parental leave for your child(ren) by surrogacy? (Provide average if more than one child by surrogate)

- 0 days
- 1 - 2 weeks
- 3 - 4 weeks
- 5 - 8 weeks
- 8 - 12 weeks
- > 12 weeks

What is the duration of UNPAID (total leave minus paid leave) parental leave for your child(ren) by surrogacy? (Provide average if more than one child by surrogate)

- 0 days
- 1 - 2 weeks
- 3 - 4 weeks
- 5 - 8 weeks
- 8 - 12 weeks
- > 12 weeks

- No

Have you adopted a child?

- Yes

What was your total out of pocket expense for all adoptions?

- 0 - \$40k
- 40 - < 80k
- 80 - < 120k
- 120 - < 1600k
- 160 - < 200k
- >200k

What is the duration of PAID parental leave for your adopted child(ren)? (Provide average if more than one child by adoption)

- 0 days
- 1 - 2 weeks
- 3 - 4 weeks
- 5 - 8 weeks
- 8 - 12 weeks
- > 12 weeks

What is the duration of UNPAID (total leave minus paid leave) parental leave for your adopted child(ren)? (Provide average if more than one child by adoption)

- 0 days
- 1 - 2 weeks
- 3 - 4 weeks
- 5 - 8 weeks
- 8 - 12 weeks

- > 12 weeks
- No

**For each of your biologic children you will answer a set of questions.**

**The following questions are regarding your FIRST child: (These questions will be repeated for each child)**

How old were you/your partner when your child was born? (Please provide age of the CHILDBEARING parent) \_\_\_\_\_

What stage of your career were you?

- Before Residency
- Resident
- Fellow
- Junior faculty (0-3 years postgraduate)
- Early career (>3 years-7 years postgraduate)
- Mid career (>7 years-12 years postgraduate)
- Late career (>12 years postgraduate)

During your pregnancy, on average, how many hours did you work per week? (for female participants only)

- < 40 hours
- 40 hours
- 40-60 hours
- 60-80 hours
- >80 hours

During your partner's pregnancy, on average, how many hours did she work per week? (for male participants only)

- < 40 hours
- 40 hours
- 40-60 hours
- 60-80 hours
- >80 hours

Did you reduce your work schedule (# of cases, case mix, call schedule) during your pregnancy? (for female participants only)

- Yes

At how many weeks' gestation did you reduce your schedule? \_\_\_\_\_

I felt stigma or resentment from colleagues by reducing my work/OR/call hours during pregnancy (for female participants only)

- Strongly agree
- Agree
- Disagree
- Strongly disagree

I felt guilty about burdening my colleagues by reducing my work/OR/call hours during pregnancy. (for female participants only)

- Strongly agree
- Agree
- Disagree
- Strongly disagree

- No

Why didn't you reduce your schedule? (check all that apply)

- Did not want to be considered weak by colleagues (stigma)
- Concerned about financial loss/penalty if I reduced my work schedule (e.g. loss of bonus, reduced pay, reduced RVU)
- Concerned about burdening by colleagues with extrawork (guilt)



- I would need to pay back my call (lack of redundancy in workforce)
- I wanted to, but my work could not accommodate it
- Really didn't feel like I needed to

During your pregnancy, on average, how often were you on overnight call? (defined as working 6p-6a, whether night shift, swing, or 24 hour call) (for female participants only)

- None
- 2-4/month
- 4-6x/month
- >6x/month

How many hours a week were you operating in the last trimester? (for female participants only)

- 0-< 8 hrs
- 8-< 12 hours
- 12-< 16 hours
- >16 hours

How many hours a week were you working (clinic+OR+administrative) in your last trimester? (for female participants only)

- < 30 hrs/week
- 30-40 hrs/week
- 40-60 hrs/week
- >60 hrs/week

Did you/your partner experience any of the following complications with this pregnancy? (Check all that apply)

- Preeclampsia or Hypertension
- Placental Abruption or Bleeding in Pregnancy
- Placenta Previa or Accreta
- Intrauterine Growth Restriction
- Preterm Labor or Rupture of Membranes
- Placental Insufficiency (including Oligohydramnios)
- Multiple Gestation
- Cesarean Delivery

What was the indication for cesarean delivery?

- Elective primary c-section
- Elective repeat c-section (including did not want to VBAC)
- Contraindication to labor (i.e. placenta previa, prior uterine surgery other than prior low transverse cesarean, malpresentation or breech)
- Failure to progress in labor
- Non-reassuring fetal heart tracing
- Other. Please specify: \_\_\_\_\_
- I don't know

- Postpartum Hemorrhage
- Postpartum Depression
- Hyperemesis
- Low Back Pain
- Carpal Tunnel Syndrome
- Other Musculoskeletal Pain
- Other complication. Please specify: \_\_\_\_\_
- None of the above

Did any of the pregnancy complications necessitate bedrest or time away from work?

- Yes

Approximately how much time were you/your partner on bedrest/away from work?

- 0-2 weeks
- 2-4 weeks
- 4-6 weeks

- 6-8 weeks
- >8 weeks

I felt my colleagues were supportive of extra time off

- Strongly agree
- Agree
- Disagree
- Strongly disagree

I felt my colleagues were supportive of extra time off

- Strongly agree
- Agree
- Disagree
- Strongly disagree

I felt the leadership (PD, division chief or chair, boss, practice manager) were supportive of extra time off

- Strongly agree
- Agree
- Disagree
- Strongly disagree

At the time of delivery, did you have financial loss as a result of work restrictions during pregnancy

- Yes (Please estimate the loss)
  - < \$10,000
  - \$10,001-\$25,000
  - \$25,001-\$50,000
  - \$50,001-\$75,000
  - >\$75,000
- No

- No

If you/your partner had an ANTEPARTUM complication (other than Cesarean Delivery, Postpartum Hemorrhage, Postpartum Depression), did it result in a preterm delivery before 37 weeks?

- Yes

At what gestational age (# of weeks pregnancy)? \_\_\_\_\_

- No

**Did your baby require a NICU stay?**

- Yes

Did you receive any extra time off because your baby was in the NICU?

- Yes

I felt my colleagues were supportive of extra time off

- Strongly agree
- Agree
- Disagree
- Strongly disagree

I felt the leadership (PD, division chief or chair, boss, practice manager) were supportive of extra time off

- Strongly agree
- Agree
- Disagree
- Strongly disagree

At the time of delivery, did you have financial loss as a result of the extra time off for your child's NICU stay (penalty or financial loss from lower RVU's, loss of bonus, direct salary reduction)?

- Yes
  - Please estimate the loss: < \$10,000
  - \$10,001-\$25,000
  - \$25,001-\$50,000

- \$50,001-\$75,000
      - >\$75,000
    - No
  - No, I stuck to my original parental leave duration plan
 

After the birth of this NICU baby what is the reason you did not take extra time off? (check all that apply)

    - My program director was not supportive of more time off
    - I worried my coresidents would have resented me if I took more time off
    - I worried about burdening my coresidents with more time off
    - I did not want to extend my training by taking more time off but I was offered the option to
    - I did not feel I needed extra time off
    - Other. Please specify: \_\_\_\_\_

After the birth of this NICU baby what is the reason you did not take extra time off? (check all that apply)

    - My boss/chair/leadership were not supportive of more time off
    - I worried about burdening my colleagues with more time off
    - I worried about the financial losses associated with more time off
    - I did not feel I needed the extra time off
    - Other. Please specify: \_\_\_\_\_
- No

Did this baby experience any of the following neonatal complications? (check all that apply)

- Blood Transfusion
- Congenital Anomalies
- Hypoxia requiring supplemental oxygen and monitoring
- Intraventricular Hemorrhage
- Intubation
- Meconium Aspiration
- Necrotizing Enterocolitis
- Neonatal Sepsis
- Nerve Palsy
- Pneumothorax
- Seizures
- Skeletal Fracture
- Therapeutic Hypothermia
- Other. Please specify: \_\_\_\_\_
- None of the above

Did you breastfeed this baby? (for female participants only)

- Yes.

For how long?

- 1 day - < 1 month
- 1 - < 3 months
- 3 - < 6 months
- 6 - < 12 months
- >12 months

Did you breastfeed as long as you would have liked to?

- Yes
- No

What was the main barrier to breastfeeding as long as you would have liked to? (check all that apply)

- Inadequate milk supply
- Inadequate time to express milk at work
- Inadequate lactation facilities to express milk at work

- Fatigue
- Medical contraindication

Did you want to breastfeed? (for female participants only)

- Yes
- No

### Final questions

Did you delay children due to your training?

- Yes

Do you regret delaying childbearing due to your training?

- Not at all
- A little bit
- Somewhat
- Moderately so
- Extremely so

- No

How often do you feel burned out from your work?

- Never
- A few times a year
- Once a month or less
- A few times a month
- Once a week
- A few times a week
- Daily

How often do you agree with the statement: "I feel more callous toward people since I took this job"?

- Never
- A few times a year
- Once a month or less
- A few times a month
- Once a week
- A few times a week
- Daily

During the past month, have you often been bothered by feeling down, depressed, or hopeless?

- Yes
- No

During the past month, have you often been bothered by little interest or pleasure in doing things?

- Yes
- No

How would you rate your overall well-being this past week? This question refers to your physical, emotional, and spiritual state, including things like fatigue, stress, depression, anxiety, sense of meaning and purpose. (0= As bad as it can be; 10 = As good as it can be): (Select number 0-10)

What is the likelihood you will reduce your work hours devoted to clinical care (unrelated to COVID-19 pandemic) during the next 12 months?:

- None
- Slight
- Moderate
- Likely
- Definite

What is the PRIMARY reason for doing so? (for those that answer anything other than 'none' or 'slight' in above question)

- Frustration with EMR or administrative tasks
- To spend more time with family
- Declining reimbursement for care
- To pursue other leadership opportunities/administrative roles
- To pursue research or medical education
- Other reason. Please specify: \_\_\_\_\_

What is the likelihood you will leave your current practice within the next 3-5 years?

- None
- Slight
- Moderate
- Likely
- Definite

What would you do if you left your current practice?

- Look for another job but continue to work as a surgeon
- Look for another job in medicine but not as a surgeon
- Leave medicine and pursue a different career
- Stop working or retire
- Other. Please specify: \_\_\_\_\_

Would you recommend a career as a surgeon to your child?

- Yes
- No

Were you pregnant during the COVID-19 pandemic?

- Yes

At what stage of your pregnancy were you? (Select answer that most applies)

- First trimester
- Second trimester
- Third trimester but less than 37 weeks
- $\geq 37$  weeks

Did you receive any special accommodations during pregnancy to keep you and your baby safe during the pandemic?

- Yes, I did not have to come to work
- Yes, I had to come to work but they changed my schedule to minimize risk
- No, I did not receive any accommodations but went into work minimally
- No, I did not receive any accommodations and worked full time

- No

Is there anything else about your experience of infertility/surrogacy/adoption/pregnancy/pregnancy complications you would like to share? \_\_\_\_\_

How did you access this survey?

- AWS provided link
- AAS provided link
- SAAS provided link
- ACS-YFA provided link
- Facebook: Surgeon Moms Group
- Facebook: Physician Moms Group
- Twitter
- Personal communication/notification
- WTS (Women in Thoracic Surgery)
- SBAS
